# Supplementary material
Source: HighWire-hosted journal article supplement (https://gut.bmj.com/content/gutjnl-2022-327498)
Supplement: inline-supplementary-material-3 [file inline-supplementary-material-3.xlsx]

## Sheet: Main1
	input					output
pat	Plin2MonocytesMFI	DIABETES(NO=0,YES=1)	TGmgdl	ALT(UIL)	Waist Circunference(cm)	NAS level
1	2	0	167	14	100	0
2	1.4	0	88	17	155	0
3	1.7	0	78	17	110	0
4	2.1	0	141	11	131	0
5	2	0	120	22	140	0
6	1.7	0	60	11	129	0
7	1.1	1	309	34	98	0
8	1.3	0	314	11	154	0
9	1.5	1	201	24	127	0
10	1.3	0	62	9	96	0
11	1.6	0	85	10	98	0
12	1.9	0	114	35	157	0
13	1.7	1	126	32	150	0
14	2.1	0	122	13	119	0
15	1.1	0	73	15	160	0
16	2.3	0	123	19	138	0
17	1.9	0	239	27	132	0
18	4.6	0	86	44	114	2
19	1.3	0	101	16	150	0
20	1.4	0	114	16	125	0
21	1.4	0	100	12	110	0
22	1.6	0	116	37	150	0
23	2.6	0	57	5	119	0
24	1.6	0	127	23	115	0
25	1.1	0	100	25	123	0
26	1.7	0	77	20	108	0
27	1.5	0	95	14	121	0
28	1.4	0	87	15	115	0
29	1.2	0	79	10	94	0
30	2	0	57	13	109	0
31	1.8	0	79	12	99	0
32	2	0	62	9	96	0
33	2.2	0	113	29	107	0
34	1.5	0	111	10	123	0
35	1.1	0	55	12	123	0
36	3.4	0	95	11	130	0
37	2.2	0	194	16	128	0
38	3.6	0	136	13	127	2
39	3.6	0	171	16	117	2
40	2.9	1	235	64	115	2
41	4.6	0	59	34	131	2
42	3.2	1	55	28	123	1
43	2.3	1	130	26	139	1
44	2.3	0	87	27	111	0
45	2.8	1	98	16	114	1
46	2.5	1	146	45	101	1
47	3.2	1	256	56	137	2
48	2.7	1	111	21	146	1
49	2.7	0	143	19	116	0
50	2.2	1	181	25	154	1
51	5.7	1	226	27	130	2
52	3.7	0	61	20	104	2
53	3.1	0	60	15	122	1
54	2.6	0	140	21	127	0
55	4.6	0	135	17	136	2
56	3.4	1	181	31	120	2
57	5.1	0	99	48	148	2
58	4.8	0	120	23	139	2
59	4.4	1	141	23	132	2
60	5.3	0	195	26	155	2
61	3.8	1	177	29	125	2
62	6.1	0	151	33	133	2
63	3.9	1	227	62	152	2
64	4	1	124	47	150	2
65	3.6	1	85	43	114	2
66	3.9	0	190	18	123	2
67	3.3	0	346	41	111	2
68	3.6	1	117	17	120	2
69	2.8	1	100	24	111	1
70	5	1	65	19	135	2
71	4.9	1	188	22	128	2
72	5	1	194	55	143	2
73	3.4	0	167	16	162	0
74	4.8	0	96	32	137	2
75	5.2	1	97	37	123	2
76	4.7	1	181	60	133	2
77	5	1	270	99	152	2
78	4.8	0	208	101	123	2
79	5.7	0	208	11	121	2
80	4.9	1	269	33	118	2
81	4.8	0	90	66	129	2
82	5.3	0	184	75	130	2
83	3.8	0	196	41	150	2
84	4.1	0	186	21	122	2
85	3.1	0	126	50	136	1
86	5.4	0	156	33	139	2
87	6	1	239	43	110	2
88	5.5	1	66	70	140	2
89	12	1	127	30	151	2
90	4	1	125	41	130	2
91	9.7	1	129	43	112	2
92	5.6	0	189	28	155	2
93	4.7	1	179	46	155	2
94	4.6	0	176	7	149	2
95	5.7	0	134	17	160	2
96	6.3	0	290	97	160	2
97	7	0	110	43	152	2
98	6.6	1	188	53	136	2
99	5.2	1	189	49	149	2
100	7.3	0	92	57	143	2
101	0.9	0	62	17	80.8	0
102	0.7	0	152	18	93.07	0
103	0.7	0	92	23	87.25	0
104	0.6	0	114	15	81.11	0
105	1.3	0	135	19	86.97	0
106	0.9	0	124	10	87.5	0
107	1	0	110	10	87.88	0
108	0.9	0	121	16	90.8	0
109	1.6	0	78	24	78.91	0
110	1	0	62	17	74	0
111	0.6	0	135	18	80	0
112	0.9	0	92	23	83	0
113	0.8	0	114	17	75	0
114	1.1	0	135	19	97	0
115	0.8	0	124	16	72	0
116	1	0	110	16	97	0
117	1.3	0	121	16	98	0
118	1.4	0	75	17	73	0
119	1.8	0	60	19	80	0
120	1.1	0	96	24	83	0
121	2	0	76	20	90.95	0
122	1	0	63	11	85.14	0
123	1.1	0	102	11	80	0
124	0.9	0	86	12	91	0
125	1.3	0	90	13	93	0
126	1.03	0	85	12	80	0
127	1.17	0	96	11	82	0
128	1	0	81	12	79	0
129	1.9	0	93	13	81	0
130	1.7	0	88	11	94	0
131	1.2	0	92	12	86	0
132	1.4	0	93	12	82	0
133	1.7	0	80	31	81	0
134	1.4	0	44	36	79	0
135	1.9	0	92	16	83	0
136	1.6	0	67	12	72	0
137	2	0	99	8	80	0
138	1.7	0	76	18	70	0
139	2	0	100	14	84	0
140	1.3	0	54	10	82	0
141	1.6	0	24	24	85	0
142	1.7	0	68	18	78	0
143	1.6	0	73	15	83	0
144	1.6	0	94	22	74	0
145	1.6	0	55	28	64	0
146	1.5	0	69	23	72	0
147	1.6	0	72	15	69	0
148	1.7	0	67	17	77	0
149	1.4	0	87	12	71	0
150	1.6	0	72	20	83	0
151	2	0	121	51	139	0
152	2	1	183	26	113	1
153	2.1	1	47	21	120	1
154	2.9	1	144	9	134	1
155	2.2	1	100	27	131	1
156	4.6	1	130	24	168	2
157	2.7	1	87	24	155	1
158	3.1	1	93	20	112	1
159	3.4	0	120	61	146	1
160	3.6	0	48	10	120	1
161	2.1	0	165	39	139	0
162	1.9	1	83	44	116.5	1
163	2.9	0	166	23	95	2
164	3	0	227	17	126	0
165	2.5	0	73	29	141	1
166	1.7	1	207	28	119	0
167	1.6	0	192	34	137	0
168	2.8	0	160	36	125	1
169	3.3	1	93	107	118	2
170	1.6	0	83	16	137.5	0
171	2	1	65	15	119	1
172	1.2	0	77	18	121	0
173	4.4	1	209	19	118	2
174	1.6	0	85	21	147	0
175	3.8	0	247	22	132	2
176	1.3	0	152	17	137	0
177	1.8	1	201	46	140	1
178	3.1	0	96	15	155	0
179	2.8	0	114	33	122	1
180	3.1	0	129	37	157.49	1
181	2.6	0	168	34	124	0
182	2.7	0	101	27	103	1
183	2.9	0	147	24	116	0
184	2.5	0	160	20	127	0
185	2.7	1	124	25	126.55	1
186	3	0	154	17	116	0
187	1.3	1	40	43	117	1
188	2.6	1	109	61	120	1
189	4.2	1	218	27	144	2
190	4.4	1	106	27	132	2
191	3.2	1	111	16	120	2
192	2.9	1	102	55	121	1
193	4.4	0	90	31	145	2
194	3.3	0	163	20	130	2
195	3.4	0	114	75	113	2
196	3.4	1	114	75	113	2
197	5.4	0	162	32	128	2
198	4.3	0	207	36	109	2
199	4.8	0	102	35	138	2
200	3.5	0	121	23	165	1
201	5	1	131	23	135	2
202	4.4	1	95	63	119	2
203	4.2	1	221	61	139	2
204	4.6	1	274	29	132	2
205	4.2	0	266	55	160	2
206	3.8	0	97	19	122	2
207	3.5	0	328	51	137.5	2
208	3.8	0	112	38	116.5	2
209	3.8	1	231	24	136	2
210	3.8	1	102	53	132	2
211	7.3	0	510	34	140	2
212	3.1	1	126	38	130	2
213	3.1	0	76	33	116.5	1
214	4.6	0	132	34	140	2
215	5	1	134	46	130	2
216	6.4	0	167	32	127	2
217	8.4	0	139	28	150	2
218	5.1	1	170	19	143	2
219	4.6	0	200	26	150	2
220	3.8	1	244	63	138	2
221	4.4	0	41	38	135	2
222	3.6	0	144	32	126	2
223	4.2	0	137	21	155	2
224	3.7	1	102	28	142	2
225	3.8	0	118	51	147.08	2
226	4.6	0	160	41	133.55	2
227	3.6	0	152	18	130	2
228	3.7	1	131	23	126	2
229	4	0	160	43	116	2
230	3.1	1	182	16	126	2
231	4.3	0	162	41	115	2
232	4.8	0	164	25	124	2
233	4.2	0	368	25	116.92	2
234	4	0	324	66	105	2
235	6	0	250	22	101	2
236	6.6	0	178	25	121	2
237	6.7	0		31	129	#NUM!
238	8.7	0	130	21	128.5	2
239	8	0	55	34	152	2
240	9.1	0	158	60	104	2
241	8.5	1	200	46	140.39	2
242	7	0	205	38	127	2
243	7	0	76	44	148.06	2
244	6.6	1	91	24	113	2
245	7.9	0	150	40	120	2
246	6.4	0	322	36	106	2
247	6	1	179	46	155	2
248	7.2	0	102	46	162	2
249	10	0	244	122	138	2
250	12	1	228	81	118	2

## Sheet: Formula1
weights								Sigmoid(h)			sum output 1				sum output 2				sum output 3					NAS Level 0	NAS Level 1	NAS Level 2			NAS Level
						training	Pat	S(h1)	S(h2)	S(h3)	Wh1o1*S(h1)	Wh2o1*S(h2)	Wh3o1*S(h3)	b2o1 + sum(whjo1*S(hj))	wh1o2*S(h1)	wh2o2*S(h2)	wh3o2*S(h3)	b2o2 + sum(whjo2*S(hj))	wh1o3*S(h1)	wh2o3*S(h2)	wh3o3*S(h3)	b2o3 + sum(whjo3*S(hj))	Pat
1	0.204888	b1		h	1	1	1	0.785948	0.789899	0.365272	2.90406	0.673761	-0.889257	2.45138	-1.97792	1.69066	-0.15172	-0.578704	-0.926008	-2.36443	1.04071	-1.87247	1	0.942009	0.0455102	0.0124805	$Y$3	NAS Level 0	0
2	-3.48579	i	1	h	1	1	2	0.872494	0.96161	0.077807	3.22384	0.820226	-0.189421	3.61746	-2.19572	2.05819	-0.0323181	-0.30958	-1.02798	-2.87842	0.221683	-3.30746	2	0.979734	0.0193026	0.000963059	$Y$4	NAS Level 0	0
3	-1.26966	i	2	h	1	1	3	0.720108	0.905444	0.158208	2.66078	0.772318	-0.385158	2.81075	-1.81222	1.93797	-0.0657136	-0.0796939	-0.848434	-2.7103	0.450758	-2.73072	3	0.943866	0.0524331	0.00370067	$Y$5	NAS Level 0	0
4	0.918628	i	3	h	1	1	4	0.812724	0.823601	0.26427	3.00299	0.702508	-0.643365	2.82495	-2.0453	1.7628	-0.109768	-0.532	-0.957555	-2.46531	0.752943	-2.29267	4	0.96077	0.0334746	0.00575525	$Y$6	NAS Level 0	0
5	-1.4206	i	4	h	1	1	5	0.632273	0.856496	0.231661	2.33623	0.730567	-0.56398	2.26563	-1.59118	1.8332	-0.0962233	0.0060767	-0.744947	-2.56378	0.660037	-2.27144	5	0.896779	0.093621	0.0095998	$Y$7	NAS Level 0	0
6	0.55578	i	5	h	1	1	6	0.803915	0.928955	0.097232	2.97044	0.792372	-0.236712	3.28892	-2.02314	1.98829	-0.0403865	-0.214957	-0.947177	-2.78067	0.277028	-3.07357	6	0.969175	0.0291533	0.0016719	$Y$8	NAS Level 0	0
7	0.945594	b1		h	2	1	7	0.803528	0.955993	0.480797	2.96901	0.815435	-1.1705	2.37676	-2.02216	2.04616	-0.199705	-0.315428	-0.946721	-2.86161	1.36986	-2.06121	7	0.92631	0.0627412	0.0109488	$Y$9	NAS Level 0	0
8	-3.30503	i	1	h	2	1	8	0.981383	0.951382	0.166187	3.62618	0.811502	-0.404583	3.79592	-2.46975	2.03629	-0.0690277	-0.64221	-1.15627	-2.8478	0.473491	-3.15333	8	0.987384	0.011669	0.000947254	$Y$10	NAS Level 0	0
9	0.118264	i	2	h	2	1	9	0.639037	0.92649	0.448902	2.36123	0.79027	-1.09285	1.82146	-1.6082	1.98302	-0.186457	0.0486292	-0.752917	-2.77329	1.27899	-1.86997	9	0.836968	0.142161	0.020871	$Y$11	NAS Level 0	0
10	-0.407265	i	3	h	2	1	10	0.923934	0.958568	0.080191	3.41391	0.817631	-0.195225	3.79913	-2.32517	2.05167	-0.0333083	-0.446535	-1.08858	-2.86931	0.228476	-3.35217	10	0.985115	0.0141129	0.000772177	$Y$12	NAS Level 0	0
11	-0.0762838	i	4	h	2	1	11	0.872682	0.912199	0.154411	3.22453	0.77808	-0.375914	3.38951	-2.19619	1.95243	-0.0641365	-0.447627	-1.0282	-2.73051	0.43994	-2.94152	11	0.977197	0.0210636	0.0017396	$Y$13	NAS Level 0	0
12	1.07603	i	5	h	2	1	12	0.51943	0.887435	0.197097	1.91928	0.756957	-0.479835	1.95922	-1.3072	1.89942	-0.0818668	0.370633	-0.611995	-2.65639	0.56156	-2.32957	12	0.821061	0.167673	0.0112662	$Y$14	NAS Level 0	0
13	-0.89765	b1		h	3	1	13	0.351992	0.921844	0.378177	1.3006	0.786307	-0.920672	0.929049	-0.885823	1.97307	-0.15708	0.790443	-0.414718	-2.75939	1.07748	-1.71937	13	0.51511	0.44844	0.0364507	$Y$15	NAS Level 0	0
14	2.23484	i	1	h	3	1	14	0.739647	0.81514	0.273199	2.73297	0.695292	-0.665104	2.52598	-1.8614	1.74469	-0.113476	-0.369911	-0.871456	-2.43999	0.778383	-2.15581	14	0.939397	0.0519016	0.00870115	$Y$16	NAS Level 0	0
15	1.0263	i	2	h	3	1	15	0.942003	0.984291	0.0373117	3.48067	0.839572	-0.0908355	3.99223	-2.37065	2.10673	-0.0154979	-0.419141	-1.10987	-2.94631	0.106307	-3.57262	15	0.987501	0.0119869	0.000511876	$Y$17	NAS Level 0	0
16	0.881851	i	3	h	3	1	16	0.568995	0.787549	0.293077	2.10242	0.671757	-0.713497	1.82349	-1.43193	1.68563	-0.121733	-0.00775779	-0.670392	-2.3574	0.83502	-1.81552	16	0.842821	0.135031	0.0221479	$Y$18	NAS Level 0	0
17	0.242239	i	4	h	3	1	17	0.736926	0.831527	0.36004	2.72292	0.709269	-0.87652	2.31848	-1.85455	1.77976	-0.149547	-0.364062	-0.86825	-2.48904	1.02581	-1.95423	17	0.92393	0.0631864	0.0128832	$Y$19	NAS Level 0	0
18	-1.38031	i	5	h	3	1	18	0.022615	0.248886	0.694271	0.0835617	0.212293	-1.69021	-1.63154	-0.0569129	0.532705	-0.288374	0.047692	-0.0266451	-0.745	1.97808	1.58369	18	0.0319793	0.171454	0.796567	$AA$20	NAS Level 2	2
19	-0.237185	b2		o	1	1	19	0.914978	0.967041	0.076841	3.38082	0.824859	-0.18707	3.78142	-2.30264	2.06981	-0.0319168	-0.40447	-1.07803	-2.89468	0.218931	-3.37652	19	0.984264	0.0149693	0.0007664	$Y$21	NAS Level 0	0
20	3.69497	h	1	o	1	1	20	0.893553	0.947277	0.12325	3.30165	0.808001	-0.300051	3.57242	-2.24872	2.02751	-0.0511932	-0.412129	-1.05279	-2.83552	0.351156	-3.1599	20	0.980592	0.0182398	0.00116864	$Y$22	NAS Level 0	0
21	0.852972	h	2	o	1	1	21	0.912522	0.944081	0.122303	3.37174	0.805274	-0.297748	3.64209	-2.29646	2.02067	-0.0508002	-0.466316	-1.07514	-2.82595	0.34846	-3.17537	21	0.982773	0.0161509	0.00107564	$Y$23	NAS Level 0	0
22	-2.4345	h	3	o	1	1	22	0.643016	0.929062	0.154879	2.37592	0.792464	-0.377053	2.55415	-1.61821	1.98852	-0.0643307	0.16625	-0.757604	-2.78099	0.441272	-2.72007	22	0.911623	0.0837073	0.00466928	$Y$24	NAS Level 0	0
23	-0.139726	b2		o	2	1	23	0.722724	0.76146	0.197234	2.67044	0.649504	-0.480167	2.60259	-1.81881	1.62979	-0.0819235	-0.410664	-0.851516	-2.2793	0.561948	-2.19162	23	0.945708	0.0464639	0.0078281	$Y$25	NAS Level 0	0
24	-2.5166	h	1	o	2	1	24	0.768421	0.907697	0.203371	2.83929	0.77424	-0.495107	2.88124	-1.93381	1.94279	-0.0844725	-0.215215	-0.905357	-2.71704	0.579433	-2.66571	24	0.95319	0.0430929	0.00371679	$Y$26	NAS Level 0	0
25	2.14035	h	2	o	2	1	25	0.900687	0.975578	0.0768351	3.32801	0.832141	-0.187055	3.73591	-2.26667	2.08808	-0.0319144	-0.350228	-1.06119	-2.92023	0.218915	-3.38526	25	0.982693	0.0165132	0.000793841	$Y$27	NAS Level 0	0
26	-0.415362	h	3	o	2	1	26	0.666427	0.903117	0.165439	2.46243	0.770333	-0.402761	2.59282	-1.67713	1.93299	-0.068717	0.0474142	-0.785188	-2.70333	0.471359	-2.63991	26	0.922696	0.0723777	0.00492625	$Y$28	NAS Level 0	0
27	0.377253	b2		o	3	1	27	0.868892	0.937612	0.123894	3.21053	0.799757	-0.301621	3.47148	-2.18666	2.00682	-0.051461	-0.371022	-1.02373	-2.80659	0.352993	-3.10007	27	0.977671	0.0209611	0.00136836	$Y$29	NAS Level 0	0
28	-1.1782	h	1	o	3	1	28	0.872651	0.948526	0.109009	3.22442	0.809066	-0.265382	3.53092	-2.19612	2.03018	-0.045278	-0.35094	-1.02816	-2.83925	0.310581	-3.17958	28	0.978636	0.0201721	0.00119203	$Y$30	NAS Level 0	0
29	-2.99333	h	2	o	3	1	29	0.944657	0.963616	0.0870363	3.49048	0.821937	-0.21189	3.86334	-2.37733	2.06248	-0.0361516	-0.490726	-1.113	-2.88442	0.247979	-3.37219	29	0.986607	0.0126823	0.000710874	$Y$31	NAS Level 0	0
30	2.84915	h	3	o	3	1	30	0.614525	0.865353	0.16282	2.27065	0.738122	-0.396385	2.3752	-1.54652	1.85216	-0.0676292	0.0982909	-0.724037	-2.59029	0.463897	-2.47318	30	0.900543	0.092396	0.0070612	$Y$32	NAS Level 0	0
						1	31	0.767403	0.878504	0.186701	2.83553	0.749339	-0.454524	2.89316	-1.93125	1.88031	-0.0775485	-0.268214	-0.904158	-2.62965	0.531938	-2.62462	31	0.955674	0.0404895	0.00383679	$Y$33	NAS Level 0	0
						1	32	0.730157	0.847824	0.185877	2.69791	0.72317	-0.452519	2.73138	-1.83752	1.81464	-0.0772064	-0.239805	-0.860275	-2.53782	0.529591	-2.49125	32	0.9464	0.0484961	0.00510407	$Y$34	NAS Level 0	0
						1	33	0.404365	0.765961	0.354118	1.49412	0.653343	-0.8621	1.04817	-1.01762	1.63943	-0.147087	0.334988	-0.476424	-2.29278	1.00893	-1.38301	33	0.633708	0.310568	0.0557235	$Y$35	NAS Level 0	0
						1	34	0.925621	0.936427	0.127535	3.42014	0.798746	-0.310485	3.67122	-2.32942	2.00428	-0.0529733	-0.517835	-1.09057	-2.80304	0.363366	-3.15299	34	0.984012	0.0149182	0.00106975	$Y$36	NAS Level 0	0
						1	35	0.93693	0.981783	0.0395003	3.46193	0.837433	-0.0961637	3.96601	-2.35788	2.10136	-0.0164069	-0.41265	-1.1039	-2.9388	0.112542	-3.5529	35	0.987084	0.0123801	0.000535709	$Y$37	NAS Level 0	0
						1	36	0.359212	0.525235	0.429299	1.32728	0.44801	-1.04513	0.492974	-0.903993	1.12419	-0.178314	-0.0978457	-0.423225	-1.5722	1.22313	-0.395041	36	0.508816	0.28182	0.209364	$Y$38	NAS Level 0	0
						1	37	0.741469	0.769186	0.373837	2.73971	0.656094	-0.910109	2.24851	-1.86598	1.64633	-0.155278	-0.514657	-0.873602	-2.30243	1.06512	-1.73366	37	0.924439	0.0583246	0.0172363	$Y$39	NAS Level 0	0
						1	38	0.332092	0.432448	0.557768	1.22707	0.368866	-1.35789	0.000863345	-0.835744	0.925592	-0.231676	-0.281553	-0.391272	-1.29446	1.58916	0.280681	38	0.325008	0.245043	0.429949	$AA$40	NAS Level 2	2
						1	39	0.303874	0.3848	0.645098	1.12281	0.328223	-1.57049	-0.356651	-0.76473	0.823607	-0.267949	-0.348797	-0.358026	-1.15183	1.83798	0.705372	39	0.204077	0.205686	0.590236	$AA$41	NAS Level 2	2
						1	40	0.0460111	0.527443	0.855773	0.17001	0.449894	-2.08338	-1.70066	-0.115792	1.12891	-0.355456	0.51794	-0.0542106	-1.57881	2.43822	1.18245	40	0.0356324	0.327622	0.636746	$AA$42	NAS Level 2	2
						1	41	0.0248704	0.313918	0.558125	0.0918955	0.267763	-1.35876	-1.23628	-0.0625889	0.671896	-0.231824	0.237757	-0.0293024	-0.939662	1.59018	0.998468	41	0.0679763	0.296842	0.635182	$AA$43	NAS Level 2	2
						1	42	0.0293911	0.625138	0.605124	0.108599	0.533225	-1.47318	-1.06854	-0.0739657	1.33802	-0.251345	0.872978	-0.0346287	-1.87125	1.72409	0.195464	42	0.0868896	0.60556	0.307551	$Z$44	NAS Level 1	1
						1	43	0.200587	0.800557	0.564794	0.741163	0.682853	-1.37499	-0.188163	-0.504797	1.71348	-0.234594	0.834358	-0.236332	-2.39633	1.60918	-0.646233	43	0.226619	0.630044	0.143337	$Z$45	NAS Level 1	1
						1	44	0.340616	0.76677	0.309982	1.25857	0.654033	-0.754653	0.92076	-0.857194	1.64116	-0.128755	0.515483	-0.401315	-2.2952	0.883185	-1.43607	44	0.567694	0.378534	0.0537717	$Y$46	NAS Level 0	0
						1	45	0.148252	0.663385	0.64729	0.547786	0.565848	-1.57583	-0.699382	-0.37309	1.41988	-0.26886	0.638201	-0.174671	-1.98573	1.84422	0.0610751	45	0.143904	0.548249	0.307847	$Z$47	NAS Level 1	1
						1	46	0.0742314	0.664062	0.754551	0.274283	0.566426	-1.83696	-1.23343	-0.186811	1.42133	-0.313412	0.781379	-0.0874598	-1.98776	2.14983	0.45186	46	0.0719768	0.539778	0.388246	$Z$48	NAS Level 1	1
						1	47	0.0470075	0.487057	0.858407	0.173691	0.415446	-2.0898	-1.73784	-0.118299	1.04248	-0.35655	0.4279	-0.0553845	-1.45793	2.44573	1.30967	47	0.0324844	0.283299	0.684216	$AA$49	NAS Level 2	2
						1	48	0.147294	0.72975	0.589063	0.544245	0.622456	-1.43408	-0.504559	-0.370679	1.56192	-0.244674	0.806843	-0.173542	-2.18438	1.67833	-0.302348	48	0.168478	0.625286	0.206235	$Z$50	NAS Level 1	1
						1	49	0.440462	0.629962	0.462676	1.62749	0.53734	-1.12639	0.801263	-1.10847	1.34834	-0.192178	-0.0920291	-0.518954	-1.88569	1.31823	-0.709158	49	0.613451	0.251089	0.13546	$Y$51	NAS Level 0	0
						1	50	0.307682	0.819826	0.574982	1.13688	0.699288	-1.3998	0.199185	-0.774314	1.75472	-0.238826	0.601851	-0.362513	-2.45401	1.63821	-0.801065	50	0.349211	0.522353	0.128436	$Z$52	NAS Level 1	1
						1	51	0.0158439	0.128998	0.946753	0.0585428	0.110032	-2.30487	-2.37348	-0.0398729	0.276101	-0.393245	-0.296743	-0.0186674	-0.386134	2.69744	2.66989	51	0.00609867	0.0486578	0.945244	$AA$53	NAS Level 2	2
						1	52	0.0950225	0.429539	0.491606	0.351105	0.366384	-1.19682	-0.716513	-0.239134	0.919364	-0.204195	0.33631	-0.111956	-1.28575	1.40066	0.380203	52	0.145772	0.417742	0.436486	$AA$54	NAS Level 2	2
						1	53	0.239607	0.622805	0.324407	0.885339	0.531235	-0.78977	0.38962	-0.602995	1.33302	-0.134746	0.455556	-0.282306	-1.86426	0.924283	-0.845033	53	0.423891	0.452783	0.123325	$Z$55	NAS Level 1	1
						1	54	0.445459	0.680326	0.412552	1.64596	0.580299	-1.00436	0.984711	-1.12104	1.45614	-0.171359	0.0240124	-0.524841	-2.03644	1.17542	-1.00861	54	0.658385	0.251915	0.0896998	$Y$56	NAS Level 0	0
						1	55	0.129769	0.263901	0.677845	0.479491	0.2251	-1.65022	-1.18281	-0.326576	0.564841	-0.281551	-0.183012	-0.152894	-0.789943	1.93128	1.3657	55	0.0605851	0.164654	0.774761	$AA$57	NAS Level 2	2
						1	56	0.0588209	0.448086	0.841778	0.217341	0.382205	-2.04931	-1.68695	-0.148029	0.959062	-0.349642	0.321665	-0.0693031	-1.34127	2.39835	1.36503	56	0.0337723	0.251704	0.714524	$AA$58	NAS Level 2	2
						1	57	0.01843	0.226409	0.697559	0.0680985	0.193121	-1.69821	-1.67418	-0.0463811	0.484596	-0.28974	0.00874914	-0.0217144	-0.677718	1.98745	1.66527	57	0.0289145	0.155597	0.815489	$AA$59	NAS Level 2	2
						1	58	0.0706431	0.24637	0.685301	0.261024	0.210147	-1.66837	-1.43438	-0.177781	0.52732	-0.284648	-0.0748348	-0.0832321	-0.737469	1.95252	1.50907	58	0.0418835	0.163112	0.795004	$AA$60	NAS Level 2	2
						1	59	0.0315605	0.302905	0.861001	0.116615	0.258369	-2.09611	-1.95831	-0.0794253	0.648323	-0.357627	0.0715446	-0.0371848	-0.906694	2.45312	1.88649	59	0.0180628	0.137512	0.844425	$AA$61	NAS Level 2	2
						1	60	0.0697928	0.177203	0.787036	0.257882	0.151149	-1.91604	-1.7442	-0.175641	0.379278	-0.326905	-0.262994	-0.0822302	-0.530428	2.24238	2.00697	60	0.0208468	0.0916888	0.887464	$AA$62	NAS Level 2	2
						1	61	0.0446406	0.373344	0.861509	0.164946	0.318452	-2.09735	-1.85113	-0.112343	0.799088	-0.357838	0.189182	-0.0525957	-1.11754	2.45456	1.66168	61	0.0236768	0.182146	0.794177	$AA$63	NAS Level 2	2
						1	62	0.0232349	0.111175	0.84089	0.0858523	0.0948291	-2.04715	-2.10365	-0.058473	0.237954	-0.349274	-0.309519	-0.0273755	-0.332784	2.39582	2.41291	62	0.0101487	0.0610368	0.928814	$AA$64	NAS Level 2	2
						1	63	0.0199149	0.365261	0.882824	0.0735851	0.311557	-2.14924	-2.00128	-0.050118	0.781787	-0.366692	0.225251	-0.0234639	-1.09335	2.5153	1.77574	63	0.0185346	0.171772	0.809693	$AA$65	NAS Level 2	2
						1	64	0.0154624	0.40537	0.816677	0.0571331	0.345769	-1.9882	-1.82249	-0.0389127	0.867634	-0.339216	0.349779	-0.0182179	-1.21341	2.32683	1.47246	64	0.0272079	0.238834	0.733958	$AA$66	NAS Level 2	2
						1	65	0.0153743	0.457691	0.782922	0.0568075	0.390397	-1.90603	-1.69601	-0.0386909	0.97962	-0.325196	0.476007	-0.018114	-1.37002	2.23066	1.21978	65	0.0354118	0.310772	0.653817	$AA$67	NAS Level 2	2
						1	66	0.240367	0.324789	0.696113	0.888147	0.277036	-1.69469	-0.766693	-0.604907	0.695163	-0.289139	-0.338609	-0.283201	-0.972201	1.98333	1.10518	66	0.110684	0.169823	0.719493	$AA$68	NAS Level 2	2
						1	67	0.223704	0.355006	0.790049	0.826581	0.30281	-1.92338	-1.03117	-0.562975	0.759838	-0.328156	-0.271019	-0.26357	-1.06265	2.25096	1.302	67	0.0743542	0.159014	0.766632	$AA$69	NAS Level 2	2
						1	68	0.0745205	0.456662	0.780563	0.275351	0.38952	-1.90028	-1.4726	-0.187538	0.977417	-0.324216	0.325937	-0.0878004	-1.36694	2.22394	1.14645	68	0.0481615	0.290934	0.660905	$AA$70	NAS Level 2	2
						1	69	0.0894274	0.648069	0.681353	0.330432	0.552784	-1.65876	-1.01272	-0.225053	1.3871	-0.283008	0.739309	-0.105364	-1.93989	1.94127	0.273277	69	0.0962964	0.555275	0.348428	$Z$71	NAS Level 1	1
						1	70	0.0134288	0.288667	0.793988	0.0496189	0.246225	-1.93297	-1.87431	-0.0337949	0.617849	-0.329792	0.114536	-0.0158218	-0.864076	2.26219	1.75954	70	0.0216613	0.158281	0.820058	$AA$72	NAS Level 2	2
						1	71	0.0296372	0.20815	0.912899	0.109509	0.177546	-2.22246	-2.17259	-0.0745852	0.445515	-0.379184	-0.147979	-0.0349187	-0.623064	2.60098	2.32025	71	0.0102095	0.0773178	0.912473	$AA$73	NAS Level 2	2
						1	72	0.00840661	0.203213	0.923538	0.0310622	0.173335	-2.24836	-2.28114	-0.0211561	0.434947	-0.383603	-0.109538	-0.00990471	-0.608283	2.63129	2.39036	72	0.00857407	0.0752149	0.916211	$AA$74	NAS Level 2	2
						1	73	0.384485	0.519862	0.499941	1.42066	0.443427	-1.21711	0.409793	-0.967595	1.11269	-0.207657	-0.202289	-0.453002	-1.55612	1.42441	-0.207463	73	0.48039	0.260477	0.259133	$Y$75	NAS Level 0	0
						1	74	0.0370036	0.255789	0.664065	0.136727	0.218181	-1.61667	-1.49895	-0.0931234	0.547478	-0.275828	0.0388015	-0.0435978	-0.765661	1.89202	1.46001	74	0.0401091	0.186672	0.773219	$AA$76	NAS Level 2	2
						1	75	0.00627841	0.2066	0.888919	0.0231985	0.176224	-2.16408	-2.20184	-0.0158003	0.442198	-0.369223	-0.0825514	-0.00739725	-0.618424	2.53266	2.28409	75	0.0101953	0.0848776	0.904927	$AA$77	NAS Level 2	2
						1	76	0.00830772	0.228248	0.917822	0.0306968	0.194689	-2.23444	-2.24624	-0.0209072	0.488531	-0.381228	-0.0533303	-0.0097882	-0.683222	2.61501	2.29925	76	0.00959988	0.0860269	0.904373	$AA$78	NAS Level 2	2
						1	77	0.00512892	0.185409	0.944855	0.0189512	0.158148	-2.30025	-2.36034	-0.0129075	0.39684	-0.392457	-0.14825	-0.00604292	-0.55499	2.69203	2.50825	77	0.00712902	0.065122	0.927749	$AA$79	NAS Level 2	2
						1	78	0.0141821	0.169872	0.856991	0.0524026	0.144896	-2.08635	-2.12623	-0.0356908	0.363585	-0.355962	-0.167793	-0.0167095	-0.508482	2.44169	2.29375	78	0.0109669	0.0777363	0.911297	$AA$80	NAS Level 2	2
						1	79	0.154486	0.118887	0.840253	0.570821	0.101407	-2.0456	-1.61055	-0.38878	0.254461	-0.349009	-0.623054	-0.182016	-0.355869	2.394	2.23337	79	0.0198441	0.0532717	0.926884	$AA$81	NAS Level 2	2
						1	80	0.0222974	0.167914	0.946647	0.0823882	0.143226	-2.30462	-2.31619	-0.0561137	0.359396	-0.393201	-0.229645	-0.0262709	-0.502623	2.69714	2.5455	80	0.00723074	0.0582581	0.934511	$AA$82	NAS Level 2	2
						1	81	0.0123685	0.238367	0.707436	0.0457011	0.20332	-1.72225	-1.71042	-0.0311265	0.510189	-0.293842	0.0454946	-0.0145726	-0.713511	2.01559	1.66476	81	0.0277638	0.160717	0.811519	$AA$83	NAS Level 2	2
						1	82	0.01412	0.144076	0.852627	0.0521729	0.122893	-2.07572	-2.13784	-0.0355344	0.308373	-0.354149	-0.221036	-0.0166362	-0.431267	2.42926	2.35861	82	0.0102567	0.0697373	0.920006	$AA$84	NAS Level 2	2
						1	83	0.110003	0.375681	0.673424	0.406459	0.320445	-1.63945	-1.14973	-0.276834	0.80409	-0.279715	0.107815	-0.129606	-1.12454	1.91868	1.04179	83	0.0742631	0.261168	0.664569	$AA$85	NAS Level 2	2
						1	84	0.172492	0.287202	0.725213	0.637354	0.244975	-1.76553	-1.12039	-0.434094	0.614713	-0.301226	-0.260333	-0.203231	-0.85969	2.06624	1.38057	84	0.0642778	0.151907	0.783815	$AA$86	NAS Level 2	2
						1	85	0.106856	0.555855	0.515591	0.394832	0.474128	-1.25521	-0.623434	-0.268915	1.18973	-0.214157	0.566927	-0.125899	-1.66386	1.469	0.056491	85	0.159693	0.525115	0.315192	$Z$87	NAS Level 1	1
						1	86	0.0369956	0.162229	0.795806	0.136698	0.138377	-1.93739	-1.8995	-0.0931032	0.347228	-0.330548	-0.216148	-0.0435884	-0.485607	2.26737	2.11542	86	0.0161805	0.087109	0.896711	$AA$88	NAS Level 2	2
						1	87	0.00662433	0.0896916	0.967244	0.0244767	0.0765044	-2.35476	-2.49096	-0.0166708	0.191972	-0.401756	-0.366181	-0.00780482	-0.268477	2.75582	2.85679	87	0.00455567	0.0381358	0.957308	$AA$89	NAS Level 2	2
						1	88	0.00158217	0.216966	0.863101	0.00584608	0.185066	-2.10122	-2.1475	-0.0039817	0.464385	-0.3585	-0.0378226	-0.00186412	-0.649452	2.4591	2.18504	88	0.011712	0.0965718	0.891716	$AA$90	NAS Level 2	2
						1	89	0.000661817	0.0182992	0.979212	0.00244539	0.0156087	-2.38389	-2.60303	-0.00166553	0.0391669	-0.406728	-0.508952	-0.000779756	-0.0547757	2.78992	3.11162	89	0.00320109	0.0259862	0.970813	$AA$91	NAS Level 2	2
						1	90	0.0174314	0.370523	0.840977	0.0644086	0.316046	-2.04736	-1.90409	-0.0438679	0.79305	-0.34931	0.260146	-0.0205378	-1.1091	2.39607	1.64368	90	0.0225003	0.195932	0.781568	$AA$92	NAS Level 2	2
						1	91	0.000715886	0.0257182	0.979969	0.00264518	0.0219369	-2.38574	-2.59834	-0.0018016	0.055046	-0.407042	-0.493523	-0.00084346	-0.0769831	2.79207	3.0915	91	0.00327813	0.026899	0.969823	$AA$93	NAS Level 2	2
						1	92	0.0513785	0.153123	0.805431	0.189842	0.13061	-1.96083	-1.87756	-0.129299	0.327738	-0.334546	-0.275833	-0.0605343	-0.458349	2.29479	2.15316	92	0.0160609	0.0796876	0.904251	$AA$94	NAS Level 2	2
						1	93	0.0129977	0.263332	0.893563	0.0480261	0.224615	-2.17538	-2.13993	-0.03271	0.563623	-0.371152	0.0200351	-0.015314	-0.78824	2.54589	2.11959	93	0.0124306	0.107783	0.879786	$AA$95	NAS Level 2	2
						1	94	0.413834	0.275303	0.654032	1.52911	0.234825	-1.59224	-0.0654977	-1.04146	0.589245	-0.27166	-0.863598	-0.487582	-0.824072	1.86343	0.929033	94	0.240753	0.108383	0.650864	$AA$96	NAS Level 2	2
						1	95	0.0712994	0.174147	0.729517	0.263449	0.148542	-1.77601	-1.60121	-0.179432	0.372735	-0.303014	-0.249437	-0.0840053	-0.521279	2.0785	1.85047	95	0.0274593	0.10611	0.866431	$AA$97	NAS Level 2	2
						1	96	0.00918896	0.0882999	0.9104	0.0339529	0.0753173	-2.21637	-2.34429	-0.023125	0.188993	-0.378146	-0.352004	-0.0108265	-0.264311	2.59386	2.69598	96	0.00614088	0.0450265	0.948833	$AA$98	NAS Level 2	2
						1	97	0.00807289	0.0926983	0.828191	0.0298291	0.0790691	-2.01623	-2.14452	-0.0203162	0.198407	-0.343999	-0.305634	-0.00951151	-0.277477	2.35964	2.4499	97	0.00941436	0.059212	0.931374	$AA$99	NAS Level 2	2
						1	98	0.00319747	0.0892928	0.958691	0.0118145	0.0761642	-2.33394	-2.48314	-0.00804675	0.191118	-0.398204	-0.354858	-0.00376727	-0.267283	2.73145	2.83765	98	0.00467406	0.0392641	0.956062	$AA$100	NAS Level 2	2
						1	99	0.00862819	0.192742	0.922107	0.0318809	0.164404	-2.24487	-2.28577	-0.0217137	0.412537	-0.383008	-0.131911	-0.0101658	-0.576942	2.62722	2.41736	99	0.00833954	0.0718709	0.91979	$AA$101	NAS Level 2	2
						1	100	0.00384976	0.0806002	0.840451	0.0142247	0.0687497	-2.04608	-2.20029	-0.0096883	0.172513	-0.349092	-0.325993	-0.0045358	-0.241263	2.39457	2.52602	100	0.00830599	0.0541239	0.93757	$AA$102	NAS Level 2	2
						0	101	0.941561	0.984058	0.0536783	3.47904	0.839374	-0.13068	3.95055	-2.36954	2.10623	-0.0222959	-0.425326	-1.10935	-2.94561	0.152937	-3.52478	101	0.987027	0.0124139	0.000559545	$Y$103	NAS Level 0	0
						0	102	0.988757	0.991302	0.0561616	3.65343	0.845552	-0.136726	4.12507	-2.48831	2.12174	-0.0233274	-0.529627	-1.16496	-2.9673	0.160013	-3.59499	102	0.990138	0.00942292	0.000439456	$Y$104	NAS Level 0	0
						0	103	0.974204	0.992249	0.0424529	3.59966	0.846361	-0.103352	4.10548	-2.45168	2.12376	-0.0176333	-0.485279	-1.14781	-2.97013	0.120954	-3.61974	103	0.989524	0.0100389	0.000436926	$Y$105	NAS Level 0	0
						0	104	0.992842	0.994667	0.0364661	3.66852	0.848423	-0.0887768	4.19098	-2.49859	2.12894	-0.0151466	-0.524523	-1.16977	-2.97737	0.103897	-3.66599	104	0.990744	0.00887243	0.000383461	$Y$106	NAS Level 0	0
						0	105	0.890462	0.934697	0.192135	3.29023	0.79727	-0.467754	3.38256	-2.24094	2.00058	-0.0798058	-0.459888	-1.04915	-2.79786	0.547422	-2.92233	105	0.977261	0.0209535	0.00178579	$Y$107	NAS Level 0	0
						0	106	0.985434	0.981415	0.0760815	3.64115	0.837119	-0.185221	4.05586	-2.47995	2.10057	-0.0316014	-0.550698	-1.16104	-2.9377	0.216767	-3.50473	106	0.989603	0.00988226	0.000515156	$Y$108	NAS Level 0	0
						0	107	0.976785	0.975202	0.0852562	3.60919	0.83182	-0.207556	3.99627	-2.45818	2.08728	-0.0354122	-0.546042	-1.15085	-2.9191	0.242907	-3.4498	107	0.988892	0.0105305	0.000577248	$Y$109	NAS Level 0	0
						0	108	0.971935	0.981668	0.0790254	3.59127	0.837335	-0.192388	3.99904	-2.44598	2.10112	-0.0328242	-0.517409	-1.14514	-2.93846	0.225155	-3.48119	108	0.988639	0.0108036	0.000557721	$Y$110	NAS Level 0	0
						0	109	0.618179	0.888535	0.220102	2.28415	0.757896	-0.535839	2.26902	-1.55571	1.90178	-0.0914219	0.114922	-0.728341	-2.65968	0.627102	-2.38367	109	0.88846	0.103068	0.00847225	$Y$111	NAS Level 0	0
						0	110	0.913997	0.975396	0.0749681	3.37719	0.831985	-0.18251	3.78948	-2.30017	2.08769	-0.0311389	-0.38334	-1.07688	-2.91968	0.213595	-3.40571	110	0.984098	0.0151637	0.000738254	$Y$112	NAS Level 0	0
						0	111	0.992006	0.994123	0.0447048	3.66543	0.847959	-0.108834	4.16737	-2.49648	2.12777	-0.0185687	-0.527004	-1.16879	-2.97574	0.12737	-3.6399	111	0.990537	0.00906001	0.000402915	$Y$113	NAS Level 0	0
						0	112	0.938637	0.981437	0.0768877	3.46824	0.837138	-0.187183	3.881	-2.36218	2.10062	-0.0319363	-0.433215	-1.10591	-2.93777	0.219064	-3.44736	112	0.986161	0.0131918	0.00064756	$Y$114	NAS Level 0	0
						0	113	0.976066	0.984988	0.0763589	3.60654	0.840167	-0.185896	4.02362	-2.45637	2.10822	-0.0317166	-0.51959	-1.15001	-2.9484	0.217558	-3.50359	113	0.988946	0.0105216	0.000532285	$Y$115	NAS Level 0	0
						0	114	0.939257	0.965469	0.123446	3.47053	0.823517	-0.300531	3.75633	-2.36374	2.06644	-0.051275	-0.488294	-1.10664	-2.88997	0.351717	-3.26764	114	0.984997	0.014126	0.000876929	$Y$116	NAS Level 0	0
						0	115	0.979141	0.983861	0.0849381	3.6179	0.839206	-0.206782	4.01314	-2.46411	2.10581	-0.0352801	-0.533305	-1.15363	-2.94502	0.242001	-3.4794	115	0.988961	0.0104878	0.000551076	$Y$117	NAS Level 0	0
						0	116	0.95798	0.976848	0.0835226	3.53971	0.833224	-0.203336	3.93241	-2.41085	2.0908	-0.0346921	-0.494472	-1.1287	-2.92403	0.237968	-3.43751	116	0.987575	0.0118032	0.000622092	$Y$118	NAS Level 0	0
						0	117	0.909322	0.945182	0.149416	3.35992	0.806214	-0.363755	3.56519	-2.2884	2.02302	-0.0620619	-0.467166	-1.07137	-2.82925	0.425709	-3.09765	117	0.981345	0.0174017	0.00125368	$Y$119	NAS Level 0	0
						0	118	0.795414	0.922421	0.171624	2.93903	0.786799	-0.41782	3.07082	-2.00174	1.97431	-0.0712862	-0.238445	-0.93716	-2.76111	0.488982	-2.83204	118	0.96221	0.0351619	0.00262838	$Y$120	NAS Level 0	0
						0	119	0.542334	0.861288	0.212698	2.00391	0.734654	-0.517814	1.98356	-1.36484	1.84346	-0.0883466	0.250549	-0.63898	-2.57812	0.606007	-2.23384	119	0.839287	0.148345	0.0123684	$Y$121	NAS Level 0	0
						0	120	0.881505	0.963878	0.120352	3.25713	0.82216	-0.292998	3.54911	-2.2184	2.06304	-0.0499898	-0.345074	-1.03859	-2.88521	0.342902	-3.20365	120	0.978926	0.0199309	0.00114305	$Y$122	NAS Level 0	0
						0	121	0.504515	0.819898	0.263188	1.86417	0.69935	-0.640733	1.6856	-1.26966	1.75487	-0.109318	0.236164	-0.594422	-2.45423	0.749862	-1.92153	121	0.792498	0.186002	0.0215001	$Y$123	NAS Level 0	0
						0	122	0.955828	0.979316	0.0574502	3.53176	0.835329	-0.139863	3.99004	-2.40544	2.09608	-0.0238627	-0.472945	-1.12616	-2.93142	0.163684	-3.51664	122	0.988067	0.0113904	0.000542844	$Y$124	NAS Level 0	0
						0	123	0.95892	0.96371	0.111669	3.54318	0.822018	-0.271859	3.85616	-2.41322	2.06268	-0.0463831	-0.536648	-1.1298	-2.88471	0.318161	-3.3191	123	0.987039	0.0122057	0.000755374	$Y$125	NAS Level 0	0
						0	124	0.974445	0.984388	0.0557513	3.60055	0.839655	-0.135727	4.06729	-2.45229	2.10694	-0.023157	-0.508235	-1.1481	-2.9466	0.158843	-3.5586	124	0.989327	0.010191	0.000482457	$Y$126	NAS Level 0	0
						0	125	0.908824	0.949184	0.12151	3.35808	0.809627	-0.295816	3.6347	-2.28715	2.03159	-0.0504705	-0.445755	-1.07078	-2.84122	0.346199	-3.18855	125	0.98233	0.0166011	0.00106894	$Y$127	NAS Level 0	0
						0	126	0.956411	0.97246	0.0862386	3.53391	0.829481	-0.209948	3.91626	-2.40691	2.08141	-0.0358202	-0.501044	-1.12685	-2.9109	0.245706	-3.41479	126	0.987438	0.0119152	0.000646663	$Y$128	NAS Level 0	0
						0	127	0.947512	0.957978	0.11676	3.50103	0.817128	-0.284253	3.79672	-2.38451	2.05041	-0.0484977	-0.522325	-1.11636	-2.86755	0.332667	-3.27399	127	0.986036	0.0131267	0.000837764	$Y$129	NAS Level 0	0
						0	128	0.958519	0.975107	0.0793176	3.5417	0.831739	-0.193099	3.94315	-2.41221	2.08707	-0.0329455	-0.497808	-1.12933	-2.91882	0.225987	-3.44491	128	0.987749	0.0116402	0.000611012	$Y$130	NAS Level 0	0
						0	129	0.71705	0.819233	0.286896	2.64948	0.698783	-0.69845	2.41263	-1.80453	1.75345	-0.119166	-0.309972	-0.844832	-2.45224	0.817409	-2.10241	129	0.92881	0.0610263	0.0101642	$Y$131	NAS Level 0	0
						0	130	0.830174	0.888368	0.189428	3.06747	0.757753	-0.461163	3.12687	-2.08922	1.90142	-0.0786812	-0.406203	-0.978115	-2.65918	0.539708	-2.72034	130	0.968896	0.0283062	0.00279812	$Y$132	NAS Level 0	0
						0	131	0.935159	0.957094	0.114144	3.45538	0.816374	-0.277885	3.75669	-2.35342	2.04852	-0.0474113	-0.492041	-1.10181	-2.8649	0.325214	-3.26424	131	0.985051	0.0140689	0.000879644	$Y$133	NAS Level 0	0
						0	132	0.892343	0.926883	0.163925	3.29718	0.790605	-0.399075	3.45153	-2.24567	1.98386	-0.0680881	-0.469629	-1.05136	-2.77447	0.467045	-2.98153	132	0.979024	0.0194025	0.0015738	$Y$134	NAS Level 0	0
						0	133	0.48618	0.866897	0.253251	1.79642	0.739439	-0.616541	1.68214	-1.22352	1.85547	-0.105191	0.387026	-0.57282	-2.59491	0.72155	-2.06893	133	0.770796	0.211096	0.0181081	$Y$135	NAS Level 0	0
						0	134	0.461572	0.938235	0.122204	1.7055	0.800288	-0.297505	1.97109	-1.16159	2.00815	-0.0507588	0.656075	-0.543827	-2.80845	0.348176	-2.62685	134	0.782141	0.209981	0.00787817	$Y$136	NAS Level 0	0
						0	135	0.65442	0.821416	0.28835	2.41806	0.700645	-0.70199	2.17953	-1.64692	1.75812	-0.11977	-0.148291	-0.771041	-2.45877	0.821552	-2.03101	135	0.899001	0.0876594	0.0133396	$Y$137	NAS Level 0	0
						0	136	0.781756	0.890128	0.191461	2.88857	0.759254	-0.466114	2.94452	-1.96737	1.90519	-0.0795258	-0.281434	-0.921069	-2.66445	0.545502	-2.66276	136	0.958415	0.0380661	0.00351836	$Y$138	NAS Level 0	0
						0	137	0.816276	0.792464	0.301282	3.01612	0.67595	-0.733471	2.72141	-2.05424	1.69615	-0.125141	-0.622956	-0.96174	-2.37211	0.858395	-2.0982	137	0.958449	0.0338166	0.0077346	$Y$139	NAS Level 0	0
						0	138	0.643074	0.855586	0.257921	2.37614	0.729791	-0.627909	2.24084	-1.61836	1.83126	-0.107131	-0.0339605	-0.757673	-2.56105	0.734854	-2.20662	138	0.897242	0.0922526	0.0105052	$Y$140	NAS Level 0	0
						0	139	0.675392	0.793403	0.317751	2.49556	0.67675	-0.773567	2.16155	-1.69969	1.69816	-0.131982	-0.27324	-0.795751	-2.37492	0.90532	-1.8881	139	0.904941	0.0792872	0.0157717	$Y$141	NAS Level 0	0
						0	140	0.894055	0.95347	0.0896036	3.30351	0.813283	-0.21814	3.66147	-2.24998	2.04076	-0.037218	-0.386164	-1.05338	-2.85405	0.255294	-3.27489	140	0.981898	0.0171476	0.000954218	$Y$142	NAS Level 0	0
						0	141	0.36364	0.933136	0.0826338	1.34364	0.795939	-0.201172	1.70122	-0.915136	1.99724	-0.034323	0.908056	-0.428442	-2.79319	0.235436	-2.60894	141	0.682201	0.308636	0.00916293	$Y$143	NAS Level 0	0
						0	142	0.633369	0.874445	0.21345	2.34028	0.745877	-0.519644	2.32933	-1.59394	1.87162	-0.0886589	0.0492975	-0.746239	-2.6175	0.608149	-2.37834	142	0.899842	0.0920367	0.00812178	$Y$144	NAS Level 0	0
						0	143	0.753383	0.899626	0.181369	2.78373	0.767356	-0.441544	2.87236	-1.89597	1.92552	-0.0753338	-0.185508	-0.88764	-2.69288	0.516747	-2.68652	143	0.951619	0.0447146	0.00366668	$Y$145	NAS Level 0	0
						0	144	0.677243	0.874065	0.262515	2.50239	0.745553	-0.639095	2.37167	-1.70435	1.87081	-0.109039	-0.082309	-0.797931	-2.61637	0.747945	-2.2891	144	0.9129	0.0784648	0.0086353	$Y$146	NAS Level 0	0
						0	145	0.456485	0.878793	0.223262	1.6867	0.749586	-0.543532	1.65557	-1.14879	1.88093	-0.0927345	0.499676	-0.537833	-2.63052	0.636106	-2.15499	145	0.747992	0.235451	0.0165573	$Y$147	NAS Level 0	0
						0	146	0.646501	0.904109	0.19762	2.3888	0.77118	-0.481106	2.44169	-1.62699	1.93511	-0.0820837	0.0863173	-0.761711	-2.7063	0.563047	-2.52771	146	0.907601	0.0860932	0.00630538	$Y$148	NAS Level 0	0
						0	147	0.731333	0.880788	0.220239	2.70225	0.751287	-0.536173	2.68018	-1.84047	1.8852	-0.091479	-0.186481	-0.86166	-2.63649	0.627494	-2.49341	147	0.94113	0.0535393	0.00533075	$Y$149	NAS Level 0	0
						0	148	0.647283	0.874061	0.211926	2.39169	0.745549	-0.515934	2.38412	-1.62895	1.8708	-0.088026	0.0140943	-0.762632	-2.61636	0.603808	-2.39793	148	0.907559	0.084837	0.00760427	$Y$150	NAS Level 0	0
						0	149	0.877995	0.917733	0.184026	3.24417	0.7828	-0.448012	3.34177	-2.20956	1.96427	-0.0764375	-0.461455	-1.03446	-2.74708	0.524317	-2.87997	149	0.976291	0.0217701	0.00193871	$Y$151	NAS Level 0	0
						0	150	0.667164	0.898142	0.190067	2.46515	0.76609	-0.462719	2.53134	-1.67899	1.92234	-0.0789466	0.024682	-0.786056	-2.68844	0.541528	-2.55571	150	0.919357	0.0749648	0.00567814	$Y$152	NAS Level 0	0
						0	151	0.34326	0.846999	0.273275	1.26834	0.722467	-0.665288	1.08833	-0.86385	1.81288	-0.113508	0.695794	-0.404431	-2.53535	0.7786	-1.78393	151	0.577396	0.38994	0.0326638	$Y$153	NAS Level 0	0
						0	152	0.332607	0.816019	0.630809	1.22897	0.696041	-1.53571	0.152121	-0.837039	1.74657	-0.262014	0.507789	-0.391879	-2.44262	1.79727	-0.659975	152	0.348303	0.497075	0.154621	$Z$154	NAS Level 1	1
						0	153	0.1445	0.876849	0.334322	0.533922	0.747928	-0.813907	0.230758	-0.363648	1.87677	-0.138865	1.23453	-0.17025	-2.6247	0.952531	-1.46517	153	0.255625	0.697486	0.0468891	$Z$155	NAS Level 1	1
						0	154	0.352066	0.651019	0.659813	1.30087	0.555301	-1.60632	0.0126729	-0.886009	1.39341	-0.274061	0.0936154	-0.414806	-1.94872	1.8799	-0.106369	154	0.336465	0.364832	0.298704	$Z$156	NAS Level 1	1
						0	155	0.174329	0.828763	0.505224	0.644139	0.706911	-1.22997	-0.116104	-0.438716	1.77385	-0.209851	0.985553	-0.205395	-2.48076	1.43946	-0.869449	155	0.223217	0.671694	0.105088	$Z$157	NAS Level 1	1
						0	156	0.0271257	0.333791	0.821826	0.100229	0.284714	-2.00074	-1.85298	-0.0682647	0.714431	-0.341356	0.165085	-0.0319597	-0.999148	2.3415	1.68765	156	0.0232491	0.174921	0.80183	$AA$158	NAS Level 2	2
						0	157	0.105625	0.758917	0.52374	0.39028	0.647335	-1.27505	-0.474618	-0.265815	1.62435	-0.217542	1.00127	-0.124447	-2.27169	1.49221	-0.526675	157	0.158123	0.691775	0.150102	$Z$159	NAS Level 1	1
						0	158	0.0774067	0.581097	0.704105	0.286016	0.49566	-1.71415	-1.16966	-0.194802	1.24375	-0.292458	0.616767	-0.091201	-1.73942	2.0061	0.552731	158	0.0795802	0.47494	0.44548	$Z$160	NAS Level 1	1
						0	159	0.0610466	0.500026	0.543895	0.225565	0.426508	-1.32411	-0.909226	-0.15363	1.07023	-0.225913	0.550964	-0.0719254	-1.49675	1.54964	0.358218	159	0.112885	0.486172	0.400942	$Z$161	NAS Level 1	1
						0	160	0.211778	0.527793	0.33814	0.782513	0.450193	-0.823202	0.172318	-0.53296	1.12966	-0.14045	0.316527	-0.249518	-1.57986	0.963409	-0.488716	160	0.37433	0.432398	0.193273	$Z$162	NAS Level 1	1
						0	161	0.46186	0.809097	0.340626	1.70656	0.690137	-0.829255	1.33026	-1.16232	1.73175	-0.141483	0.288227	-0.544166	-2.4219	0.970493	-1.61832	161	0.711666	0.251032	0.0373016	$Y$163	NAS Level 0	0
						0	162	0.121923	0.878021	0.452435	0.450502	0.748927	-1.10145	-0.13921	-0.306832	1.87928	-0.187924	1.24479	-0.14365	-2.62821	1.28905	-1.10555	162	0.186174	0.742992	0.0708339	$Z$164	NAS Level 1	1
						0	163	0.324365	0.501417	0.613866	1.19852	0.427695	-1.49446	-0.105429	-0.816298	1.07321	-0.254977	-0.137791	-0.382169	-1.50091	1.74899	0.24317	163	0.2954	0.285994	0.418606	$AA$165	NAS Level 2	2
						0	164	0.505479	0.523258	0.587178	1.86773	0.446324	-1.42949	0.647381	-1.27209	1.11996	-0.243892	-0.53575	-0.595557	-1.56629	1.67296	-0.111633	164	0.563556	0.172628	0.263816	$Y$166	NAS Level 0	0
						0	165	0.25333	0.775216	0.253227	0.936048	0.661238	-0.616481	0.743619	-0.637531	1.65924	-0.105181	0.776799	-0.298475	-2.32048	0.721479	-1.52022	165	0.467795	0.483577	0.0486275	$Z$167	NAS Level 1	1
						0	166	0.476709	0.883558	0.55668	1.76143	0.75365	-1.35524	0.922652	-1.19969	1.89113	-0.231224	0.320488	-0.561661	-2.64478	1.58606	-1.24313	166	0.601581	0.329441	0.0689776	$Y$168	NAS Level 0	0
						0	167	0.754196	0.906874	0.240887	2.78673	0.773538	-0.586441	2.73664	-1.89801	1.94103	-0.100055	-0.196761	-0.888597	-2.71458	0.686323	-2.5396	167	0.944887	0.0502827	0.00482989	$Y$169	NAS Level 0	0
						0	168	0.244306	0.59815	0.520595	0.902702	0.510205	-1.26739	-0.0916672	-0.61482	1.28025	-0.216235	0.309472	-0.287842	-1.79046	1.48325	-0.217802	168	0.296294	0.442523	0.261182	$Z$170	NAS Level 1	1
						0	169	0.00637151	0.512214	0.792633	0.0235425	0.436904	-1.92967	-1.70641	-0.0160346	1.09632	-0.32923	0.611329	-0.00750694	-1.53323	2.25833	1.09485	169	0.0362084	0.367611	0.59618	$AA$171	NAS Level 2	2
						0	170	0.805893	0.935778	0.11155	2.97775	0.798192	-0.271568	3.26719	-2.02811	2.0029	-0.0463335	-0.211275	-0.949506	-2.80109	0.317821	-3.05553	170	0.968382	0.0298792	0.00173831	$Y$172	NAS Level 0	0
						0	171	0.302138	0.881717	0.358526	1.11639	0.75208	-0.872834	0.758451	-0.76036	1.88719	-0.148918	0.838182	-0.35598	-2.63927	1.02149	-1.59651	171	0.459159	0.497267	0.0435731	$Z$173	NAS Level 1	1
						0	172	0.89274	0.971079	0.0704943	3.29865	0.828303	-0.171619	3.71815	-2.24667	2.07845	-0.0292806	-0.337225	-1.05183	-2.90676	0.200848	-3.38049	172	0.982168	0.01702	0.000811494	$Y$174	NAS Level 0	0
						0	173	0.0545197	0.249766	0.907138	0.201449	0.213043	-2.20843	-2.03112	-0.137205	0.534587	-0.376791	-0.119134	-0.0642354	-0.747633	2.58457	2.14995	173	0.0136607	0.0924356	0.893904	$AA$175	NAS Level 2	2
						0	174	0.749554	0.938224	0.111021	2.76958	0.800279	-0.270281	3.06239	-1.88633	2.00813	-0.0461138	-0.0640372	-0.883128	-2.80842	0.316314	-2.99798	174	0.955833	0.0419364	0.00223047	$Y$176	NAS Level 0	0
						0	175	0.256367	0.33355	0.72178	0.94727	0.284508	-1.75718	-0.762583	-0.645175	0.713914	-0.2998	-0.370787	-0.302053	-0.998425	2.05646	1.13323	175	0.109438	0.161928	0.728634	$AA$177	NAS Level 2	2
						0	176	0.93182	0.957317	0.120704	3.44305	0.816564	-0.293854	3.72857	-2.34502	2.049	-0.0501358	-0.485885	-1.09787	-2.86557	0.343903	-3.24229	176	0.984524	0.0145516	0.000924317	$Y$178	NAS Level 0	0
						0	177	0.282032	0.879387	0.55612	1.0421	0.750092	-1.35388	0.201129	-0.709761	1.8822	-0.230991	0.80172	-0.332291	-2.6323	1.58447	-1.00287	177	0.320186	0.583761	0.0960534	$Z$179	NAS Level 1	1
						0	178	0.35663	0.638223	0.343086	1.31774	0.544386	-0.835245	0.789693	-0.897495	1.36602	-0.142505	0.186297	-0.420183	-1.91041	0.977503	-0.975842	178	0.582056	0.318357	0.0995871	$Y$180	NAS Level 0	0
						0	179	0.209076	0.626286	0.449165	0.772531	0.534204	-1.09349	-0.0239433	-0.526162	1.34047	-0.186566	0.488019	-0.246335	-1.87468	1.27974	-0.464027	179	0.301883	0.50371	0.194407	$Z$181	NAS Level 1	1
						0	180	0.169052	0.597631	0.452072	0.624644	0.509762	-1.10057	-0.203349	-0.425438	1.27914	-0.187773	0.526204	-0.199178	-1.78891	1.28802	-0.322815	180	0.252427	0.523571	0.224002	$Z$182	NAS Level 1	1
						0	181	0.320966	0.649886	0.48927	1.18596	0.554335	-1.19113	0.31198	-0.807743	1.39099	-0.203224	0.240293	-0.378163	-1.94533	1.394	-0.552236	181	0.425133	0.395723	0.179143	$Y$183	NAS Level 0	0
						0	182	0.245275	0.626906	0.448427	0.906283	0.534733	-1.0917	0.112135	-0.617259	1.3418	-0.186259	0.398556	-0.288984	-1.87654	1.27763	-0.510637	182	0.348662	0.464297	0.187042	$Z$184	NAS Level 1	1
						0	183	0.311115	0.566313	0.522745	1.14956	0.483049	-1.27262	0.122802	-0.782954	1.21211	-0.217128	0.0723017	-0.366558	-1.69516	1.48938	-0.195092	183	0.373353	0.354966	0.271681	$Y$185	NAS Level 0	0
						0	184	0.527386	0.69725	0.41699	1.94868	0.594735	-1.01516	1.29106	-1.32722	1.49236	-0.173202	-0.147788	-0.621369	-2.0871	1.18807	-1.14315	184	0.754793	0.179037	0.0661701	$Y$186	NAS Level 0	0
						0	185	0.12117	0.685919	0.667597	0.447721	0.58507	-1.62527	-0.829661	-0.304937	1.46811	-0.277294	0.746152	-0.142763	-2.05319	1.90208	0.0833848	185	0.120097	0.580632	0.299271	$Z$187	NAS Level 1	1
						0	186	0.406014	0.540446	0.531034	1.50021	0.460985	-1.2928	0.431205	-1.02178	1.15675	-0.220571	-0.225328	-0.478368	-1.61773	1.51299	-0.205855	186	0.488403	0.253308	0.258289	$Y$188	NAS Level 0	0
						0	187	0.216353	0.971576	0.155233	0.799418	0.828727	-0.377916	1.01304	-0.544475	2.07952	-0.064478	1.33084	-0.254908	-2.90825	0.442282	-2.34363	187	0.41512	0.570413	0.0144674	$Z$189	NAS Level 1	1
						0	188	0.0367919	0.697015	0.687558	0.135945	0.594534	-1.67386	-1.18057	-0.0925906	1.49186	-0.285585	0.973956	-0.0433484	-2.0864	1.95895	0.206459	188	0.0733853	0.632858	0.293756	$Z$190	NAS Level 1	1
						0	189	0.0456178	0.315222	0.883155	0.168557	0.268875	-2.15004	-1.9498	-0.114802	0.674686	-0.366829	0.0533287	-0.0537472	-0.943563	2.51624	1.89618	189	0.0181105	0.134238	0.847651	$AA$191	NAS Level 2	2
						0	190	0.0195763	0.325297	0.83353	0.0723338	0.277469	-2.02923	-1.91661	-0.0492657	0.69625	-0.346217	0.161042	-0.0230649	-0.973722	2.37485	1.75532	190	0.0206982	0.16529	0.814012	$AA$192	NAS Level 2	2
						0	191	0.111957	0.560096	0.720031	0.413677	0.477746	-1.75292	-1.09868	-0.281751	1.1988	-0.299074	0.478253	-0.131908	-1.67655	2.05147	0.620264	191	0.0875754	0.423873	0.488552	$AA$193	NAS Level 2	2
						0	192	0.0277896	0.62623	0.718635	0.102682	0.534156	-1.74952	-1.34987	-0.0699355	1.34035	-0.298494	0.832198	-0.0327419	-1.87451	2.04749	0.517492	192	0.0612154	0.542649	0.396136	$Z$194	NAS Level 1	1
						0	193	0.0502889	0.333894	0.585178	0.185816	0.284802	-1.42462	-1.19118	-0.126557	0.714652	-0.243061	0.205308	-0.0592506	-0.999457	1.66726	0.985803	193	0.0721464	0.291544	0.63631	$AA$195	NAS Level 2	2
						0	194	0.304053	0.483559	0.566964	1.12347	0.412462	-1.38028	-0.0815315	-0.765181	1.03499	-0.235496	-0.105415	-0.358237	-1.44745	1.61536	0.186927	194	0.304475	0.297289	0.398236	$AA$196	NAS Level 2	2
						0	195	0.0385619	0.432793	0.630535	0.142485	0.36916	-1.53504	-1.26058	-0.097045	0.92633	-0.2619	0.427659	-0.0454338	-1.29549	1.79649	0.832811	195	0.0688596	0.372526	0.558614	$AA$197	NAS Level 2	2
						0	196	0.0111421	0.462023	0.82647	0.0411696	0.394093	-2.01205	-1.81397	-0.0280402	0.988893	-0.343284	0.477843	-0.0131276	-1.38299	2.35473	1.33587	196	0.0292183	0.289052	0.68173	$AA$198	NAS Level 2	2
						0	197	0.0381734	0.148873	0.817561	0.141049	0.126984	-1.99035	-1.95951	-0.0960672	0.318641	-0.339584	-0.256736	-0.044976	-0.445627	2.32935	2.216	197	0.0139739	0.0767046	0.909321	$AA$199	NAS Level 2	2
						0	198	0.0784106	0.218856	0.811124	0.289725	0.186678	-1.97469	-1.73547	-0.197328	0.468428	-0.33691	-0.205536	-0.0923838	-0.655108	2.31101	1.94077	198	0.0221653	0.102356	0.875478	$AA$200	NAS Level 2	2
						0	199	0.0346697	0.251303	0.678436	0.128104	0.214355	-1.65166	-1.54638	-0.0872499	0.537878	-0.281797	0.0291053	-0.040848	-0.752234	1.93296	1.51713	199	0.0367164	0.177454	0.78583	$AA$201	NAS Level 2	2
						0	200	0.202147	0.526716	0.460829	0.746926	0.449274	-1.12189	-0.162875	-0.508723	1.12736	-0.191411	0.287499	-0.23817	-1.57664	1.31297	-0.124586	200	0.277167	0.434847	0.287985	$Z$202	NAS Level 1	1
						0	201	0.0193701	0.231145	0.882199	0.0715719	0.19716	-2.14772	-2.11617	-0.0487468	0.494732	-0.366432	-0.0601727	-0.0228219	-0.691894	2.51351	2.17605	201	0.0122036	0.0953663	0.89243	$AA$203	NAS Level 2	2
						0	202	0.00508883	0.297107	0.865599	0.0188031	0.253424	-2.1073	-2.07226	-0.0128066	0.635915	-0.359537	0.123845	-0.00599568	-0.889342	2.46622	1.94813	202	0.0152177	0.136806	0.847976	$AA$204	NAS Level 2	2
						0	203	0.0146914	0.292849	0.907284	0.0542843	0.249792	-2.20879	-2.1419	-0.0369724	0.626801	-0.376852	0.073251	-0.0173095	-0.876595	2.58499	2.06833	203	0.0128974	0.118176	0.868926	$AA$205	NAS Level 2	2
						0	204	0.0356495	0.219484	0.928574	0.131724	0.187214	-2.26062	-2.17886	-0.0897157	0.469773	-0.385695	-0.145363	-0.0420025	-0.656989	2.64564	2.32391	204	0.0101104	0.0772518	0.912638	$AA$206	NAS Level 2	2
						0	205	0.0730677	0.285766	0.768304	0.269983	0.243751	-1.87044	-1.59389	-0.183882	0.611641	-0.319124	-0.0310913	-0.0860887	-0.855394	2.18901	1.62478	205	0.0325023	0.155106	0.812391	$AA$207	NAS Level 2	2
						0	206	0.146906	0.404898	0.550401	0.542814	0.345366	-1.33995	-0.688959	-0.369704	0.866624	-0.228616	0.128578	-0.173085	-1.21199	1.56817	0.560348	206	0.148086	0.335402	0.516512	$AA$208	NAS Level 2	2
						0	207	0.155848	0.364451	0.762595	0.575853	0.310866	-1.85654	-1.20701	-0.392207	0.780054	-0.316753	-0.0686319	-0.183621	-1.09092	2.17274	1.27545	207	0.0621413	0.193986	0.743873	$AA$209	NAS Level 2	2
						0	208	0.0667754	0.366753	0.636608	0.246733	0.31283	-1.54982	-1.22745	-0.168047	0.784981	-0.264423	0.212785	-0.078675	-1.09781	1.81379	1.01455	208	0.0683349	0.288488	0.643177	$AA$210	NAS Level 2	2
						0	209	0.075639	0.372583	0.86994	0.279484	0.317803	-2.11787	-1.75777	-0.190353	0.79746	-0.36134	0.106041	-0.0891182	-1.11527	2.47859	1.65145	209	0.0265322	0.171087	0.802381	$AA$211	NAS Level 2	2
						0	210	0.0121752	0.43026	0.804188	0.044987	0.367	-1.9578	-1.783	-0.0306401	0.920909	-0.334029	0.416513	-0.0143449	-1.28791	2.29125	1.36625	210	0.0299949	0.270572	0.699433	$AA$212	NAS Level 2	2
						0	211	0.036955	0.0424883	0.955891	0.136548	0.0362413	-2.32712	-2.39152	-0.0930011	0.0909399	-0.397041	-0.538828	-0.0435406	-0.127182	2.72347	2.93	211	0.0047154	0.0300698	0.965215	$AA$213	NAS Level 2	2
						0	212	0.0461711	0.578106	0.747343	0.170601	0.493108	-1.81941	-1.39288	-0.116194	1.23735	-0.310418	0.671013	-0.054399	-1.73046	2.12929	0.721678	212	0.0582663	0.458941	0.482793	$AA$214	NAS Level 2	2
						0	213	0.11072	0.573321	0.432793	0.409108	0.489027	-1.05364	-0.392686	-0.278639	1.22711	-0.179766	0.628979	-0.130451	-1.71614	1.23309	-0.236249	213	0.202136	0.561498	0.236366	$Z$215	NAS Level 1	1
						0	214	0.0525393	0.261474	0.700979	0.194131	0.22303	-1.70654	-1.52656	-0.13222	0.559646	-0.29116	-0.0034607	-0.061902	-0.782677	1.99719	1.52986	214	0.0372608	0.170894	0.791846	$AA$216	NAS Level 2	2
						0	215	0.00732343	0.213398	0.904943	0.0270599	0.182022	-2.20309	-2.23119	-0.0184302	0.456747	-0.375879	-0.0772879	-0.0086285	-0.638771	2.57831	2.30817	215	0.00968534	0.0834722	0.906842	$AA$217	NAS Level 2	2
						0	216	0.0219807	0.089008	0.87183	0.0812181	0.0759213	-2.12247	-2.20252	-0.0553167	0.190509	-0.362125	-0.366659	-0.0258978	-0.266431	2.48397	2.5689	216	0.00797723	0.0500214	0.942001	$AA$218	NAS Level 2	2
						0	217	0.00966387	0.0492413	0.891004	0.0357077	0.0420015	-2.16915	-2.32863	-0.0243201	0.105394	-0.370089	-0.428741	-0.011386	-0.147396	2.5386	2.75707	217	0.00590396	0.0394688	0.954627	$AA$219	NAS Level 2	2
						0	218	0.0307483	0.214684	0.896761	0.113614	0.18312	-2.18317	-2.12362	-0.0773813	0.4595	-0.372481	-0.130088	-0.0362278	-0.642621	2.555	2.25341	218	0.0113711	0.0834798	0.905149	$AA$220	NAS Level 2	2
						0	219	0.109967	0.247341	0.742341	0.406324	0.210975	-1.80723	-1.42712	-0.276743	0.529396	-0.30834	-0.195413	-0.129564	-0.740373	2.11504	1.62235	219	0.0391677	0.13423	0.826602	$AA$221	NAS Level 2	2
						0	220	0.0215474	0.354033	0.896816	0.0796171	0.30198	-2.1833	-2.03889	-0.0542263	0.757755	-0.372503	0.1913	-0.0253873	-1.05974	2.55516	1.84729	220	0.0169417	0.157586	0.825473	$AA$222	NAS Level 2	2
						0	221	0.0181712	0.386312	0.449839	0.0671419	0.329513	-1.09513	-0.935663	-0.0457296	0.826845	-0.186846	0.454544	-0.0214093	-1.15636	1.28166	0.481138	221	0.109414	0.439372	0.451214	$AA$223	NAS Level 2	2
						0	222	0.126719	0.407969	0.625189	0.468224	0.347986	-1.52202	-0.942999	-0.318902	0.873197	-0.25968	0.154889	-0.149301	-1.22119	1.78125	0.788019	222	0.103689	0.310842	0.585469	$AA$224	NAS Level 2	2
						0	223	0.141864	0.352853	0.604495	0.524183	0.300973	-1.47165	-0.883675	-0.357015	0.755229	-0.251084	0.00740375	-0.167145	-1.05621	1.7223	0.876198	223	0.108114	0.263557	0.628329	$AA$225	NAS Level 2	2
						0	224	0.0336963	0.483656	0.749831	0.124507	0.412545	-1.82547	-1.5256	-0.0848001	1.0352	-0.311452	0.499218	-0.0397011	-1.44774	2.13638	1.02619	224	0.0467186	0.353881	0.5994	$AA$226	NAS Level 2	2
						0	225	0.0532607	0.416037	0.58813	0.196797	0.354868	-1.4318	-1.11732	-0.134036	0.890466	-0.244287	0.372417	-0.062752	-1.24534	1.67567	0.744831	225	0.0842208	0.373599	0.54218	$AA$227	NAS Level 2	2
						0	226	0.0470804	0.234746	0.756219	0.173961	0.200232	-1.84102	-1.70401	-0.118483	0.502439	-0.314105	-0.0698741	-0.0554704	-0.702673	2.15458	1.77369	226	0.0259672	0.133083	0.84095	$AA$228	NAS Level 2	2
						0	227	0.260017	0.421439	0.5931	0.960754	0.359475	-1.4439	-0.36086	-0.654358	0.902028	-0.246351	-0.138408	-0.306353	-1.26151	1.68983	0.499222	227	0.216803	0.270816	0.512381	$AA$229	NAS Level 2	2
						0	228	0.0515038	0.430225	0.807793	0.190305	0.36697	-1.96657	-1.64648	-0.129615	0.920833	-0.335527	0.315966	-0.060682	-1.28781	2.30152	1.33028	228	0.0360476	0.256542	0.70741	$AA$230	NAS Level 2	2
						0	229	0.0649821	0.294211	0.736085	0.240107	0.250954	-1.792	-1.53813	-0.163534	0.629717	-0.305742	0.0207148	-0.0765622	-0.880673	2.09721	1.51723	229	0.0370616	0.176165	0.786773	$AA$231	NAS Level 2	2
						0	230	0.185596	0.54924	0.775976	0.685773	0.468486	-1.88912	-0.972044	-0.467072	1.17557	-0.322311	0.246457	-0.218671	-1.64406	2.21087	0.725396	230	0.101605	0.343639	0.554756	$AA$232	NAS Level 2	2
						0	231	0.0549773	0.245126	0.768296	0.20314	0.209085	-1.87042	-1.69538	-0.138356	0.524655	-0.319121	-0.0725475	-0.0647745	-0.733742	2.18899	1.76772	231	0.0263274	0.133412	0.840261	$AA$233	NAS Level 2	2
						0	232	0.0778579	0.201891	0.774086	0.287683	0.172207	-1.88451	-1.66181	-0.195937	0.432117	-0.321526	-0.225072	-0.0917326	-0.604326	2.20548	1.88668	232	0.0250202	0.105259	0.869721	$AA$234	NAS Level 2	2
						0	233	0.214742	0.209886	0.849026	0.793465	0.179027	-2.06696	-1.33165	-0.54042	0.44923	-0.352653	-0.583569	-0.25301	-0.628258	2.419	1.91498	233	0.0347022	0.0733237	0.891974	$AA$235	NAS Level 2	2
						0	234	0.0640239	0.213785	0.868668	0.236567	0.182353	-2.11478	-1.93304	-0.161123	0.457575	-0.360812	-0.204085	-0.0754333	-0.63993	2.47496	2.13685	234	0.0153408	0.0864421	0.898217	$AA$236	NAS Level 2	2
						0	235	0.0576069	0.0762289	0.913269	0.212856	0.0650211	-2.22336	-2.18267	-0.144974	0.163157	-0.379337	-0.50088	-0.0678727	-0.228179	2.60204	2.68324	235	0.00734412	0.0394757	0.95318	$AA$237	NAS Level 2	2
						0	236	0.0287419	0.0767935	0.885873	0.1062	0.0655027	-2.15666	-2.22214	-0.0723319	0.164365	-0.367958	-0.415651	-0.0338638	-0.229868	2.52398	2.6375	236	0.00734929	0.0447502	0.947901	$AA$238	NAS Level 2	2
						0	237	#NUM!	#NUM!	#NUM!	#NUM!	#NUM!	#NUM!	#NUM!	#NUM!	#NUM!	#NUM!	#NUM!	#NUM!	#NUM!	#NUM!	#NUM!	237	#NUM!	#NUM!	#NUM!	#NUM!	#NUM!	#NUM!
						0	238	0.0110877	0.039401	0.905875	0.0409689	0.0336079	-2.20536	-2.36796	-0.0279034	0.0843321	-0.376266	-0.459563	-0.0130636	-0.11794	2.58097	2.82722	238	0.00531509	0.0358359	0.958849	$AA$240	NAS Level 2	2
						0	239	0.00375939	0.0814924	0.769084	0.0138908	0.0695107	-1.87234	-2.02612	-0.00946089	0.174423	-0.319448	-0.294212	-0.00442933	-0.243934	2.19123	2.32012	239	0.0119276	0.0674079	0.920665	$AA$241	NAS Level 2	2
						0	240	0.00228931	0.0234426	0.956188	0.00845892	0.0199959	-2.32784	-2.53657	-0.00576128	0.0501755	-0.397164	-0.492476	-0.00269727	-0.0701716	2.72432	3.0287	240	0.0037048	0.0286092	0.967686	$AA$242	NAS Level 2	2
						0	241	0.00174656	0.04154	0.975548	0.00645348	0.0354324	-2.37498	-2.57027	-0.00439539	0.0889102	-0.405206	-0.460417	-0.0020578	-0.124343	2.77948	3.03033	241	0.00357351	0.029471	0.966956	$AA$243	NAS Level 2	2
						0	242	0.0153144	0.0618856	0.91213	0.0565862	0.0527867	-2.22058	-2.3484	-0.0385402	0.132457	-0.378864	-0.424673	-0.0180435	-0.185244	2.59879	2.77276	242	0.00570206	0.0390386	0.955259	$AA$244	NAS Level 2	2
						0	243	0.00549693	0.103349	0.783914	0.020311	0.088154	-1.90844	-2.03716	-0.0138336	0.221204	-0.325608	-0.257964	-0.00647651	-0.309359	2.23348	2.2949	243	0.0120444	0.0713642	0.916591	$AA$245	NAS Level 2	2
						0	244	0.00455825	0.102872	0.928803	0.0168426	0.0877468	-2.26117	-2.39377	-0.0114713	0.220182	-0.385789	-0.316804	-0.00537055	-0.30793	2.64629	2.71025	244	0.00575831	0.0459525	0.948289	$AA$246	NAS Level 2	2
						0	245	0.00685105	0.0449576	0.918748	0.0253144	0.0383476	-2.23669	-2.41022	-0.0172414	0.0962252	-0.381613	-0.442355	-0.00807194	-0.134573	2.61765	2.85225	245	0.00497232	0.0355788	0.959449	$AA$247	NAS Level 2	2
						0	246	0.0304717	0.0575041	0.941268	0.112592	0.0490493	-2.29152	-2.36706	-0.0766852	0.123079	-0.390967	-0.484299	-0.0359019	-0.172129	2.68181	2.85103	246	0.00520416	0.0341999	0.960596	$AA$248	NAS Level 2	2
						0	247	0.00559029	0.137549	0.935439	0.0206559	0.117325	-2.27733	-2.37653	-0.0140685	0.294403	-0.388546	-0.247937	-0.0065865	-0.411729	2.6652	2.62414	247	0.00633248	0.0532122	0.940455	$AA$249	NAS Level 2	2
						0	248	0.0064379	0.0927877	0.81722	0.0237878	0.0791452	-1.98952	-2.12378	-0.0162016	0.198598	-0.339442	-0.296771	-0.00758516	-0.277744	2.32838	2.4203	248	0.00987275	0.0613616	0.928766	$AA$250	NAS Level 2	2
						0	249	0.00105022	0.0185614	0.969484	0.00388052	0.0158324	-2.36021	-2.57768	-0.00264298	0.0397281	-0.402687	-0.505328	-0.00123737	-0.0555606	2.7622	3.08266	249	0.00337621	0.026819	0.969805	$AA$251	NAS Level 2	2
						0	250	0.000241022	0.0103348	0.992962	0.000890568	0.00881526	-2.41737	-2.64485	-0.000606556	0.02212	-0.412439	-0.530651	-0.000283973	-0.0309354	2.82909	3.17513	250	0.00288811	0.0239221	0.97319	$AA$252	NAS Level 2	2
